1 Article

# 2 **PBMC Treatment Significantly Changes Gene** 3 **Expression Regulation in Horses**

4 **Victor C. Mason** <sup>1,\*</sup>, **Tosso Leeb** <sup>2</sup> and **Vinzenz Gerber** <sup>1</sup>

5 <sup>1</sup> Department of Clinical Veterinary Medicine, Swiss Institute of Equine Medicine, Vetsuisse Faculty,  
6 University of Bern, and Agroscope, Länggassstrasse 124, 3012 Bern, Switzerland;  
7 victor.mason@vetsuisse.unibe.ch, vinzenz.gerber@vetsuisse.unibe.ch

8 <sup>2</sup> Department of Clinical Research and Veterinary Public Health, Institute of Genetics, Vetsuisse Faculty,  
9 University of Bern, Bremgartenstrasse 109A, 3012 Bern, Switzerland; tosse.leeb@vetsuisse.unibe.ch

10 \* Correspondence: victor.mason@vetsuisse.unibe.ch; Tel.: +41-31-631-2325

11 Received: NA; Accepted: NA; Published: NA

12 **Abstract:** Expression quantitative trait loci (eQTLs) are context dependent, and therefore change  
13 between tissues, cell types, and after cell treatment. In addition, SNP positions and RNAseq counts  
14 must be updated after assembly of new reference genome sequences. Therefore, we remapped  
15 eQTLs with Matrix eQTL using the previously generated and publicly available data from four  
16 contexts of peripheral blood mononuclear cells (PBMCs) from European Warmblood horses to the  
17 EquCab3.0 reference genome, and used a linear mixed model in R to identify eQTLs with  
18 significantly different gene expression regulation in treated PBMCs when compared to no treatment  
19 (baseline). We found no evidence that SNPs associated with significant changes in gene expression  
20 between MCK and a treatment in PBMCs caused strong opposing regulatory effects. We identified  
21 canonical pathways with a significant number of genes in PBMCs with altered gene expression  
22 regulation when treated with lipopolysaccharides (LPS) and hay-dust extract (HDE). Significant  
23 pathways included RhoA signaling in LPS, as well as histamine degradation, cholesterol  
24 biosynthesis, FcγRIIB signaling, and others in HDE. Our results support previous research  
25 indicating that pathways altered between baseline and treatment of PBMCs in horses with LPS or  
26 HDE affect inflammatory responses through RhoA, B-cell signaling, IL-4 and IFN-γ, and histamine.

27 **Keywords:** eQTL; horses; RNAseq; SNP; PBMCs; LPS; RCA; HDE

28

---

## 29 **1. Introduction**

30 Peripheral blood mononuclear cells (PBMCs) are cells with a single round nucleus (T-cells, B-  
31 cells, and natural killer (NK) cells, etc.) that are readily isolated from whole blood [1]. The  
32 transcriptional responses of PBMCs in four different *in vitro* contexts has been measured with  
33 RNAseq data in horses: no treatment (MCK) to represent baseline RNA expression,  
34 lipopolysaccharides (LPS) to mimic an inflammatory response, recombinant cyathostomin antigen  
35 (RCA) to mimic response to parasitic antigens, and hay-dust extract (HDE) to mimic severe equine  
36 asthma (SEA) (formerly known as recurrent airway obstruction, RAO) exacerbation in susceptible  
37 horses [2–5]. These RNAseq data were previously used to generate the horse transcriptome, and  
38 discover differentially expressed genes between horses with and without SEA [2–4]. The equine 670k  
39 SNP array was previously used to discover SNPs associated with SEA, and both SNP and RNAseq  
40 data were used to discover expression quantitative trait loci in horses (eQTLs) for the EquCab2 horse  
41 genome assembly [6–8].

42 A region of the genome containing a variant that influences the number of expressed RNA  
43 molecules from a gene is an eQTL. eQTLs are reproducible when the same conditions are applied to  
44 the same cell type from the same species [9,10]. However eQTLs are also context-dependent, and  
45 therefore eQTLs change depending upon environmental conditions, length or type of cell treatment,

46 or cell types analyzed [11,12]. Therefore, analysis of many tissues and cell-types under various  
47 environmental conditions is required to understand context-dependent changes in gene expression  
48 regulation in various species.

49 Historically, eQTL studies analyzed multiple treatments of the same cells separately, determined  
50 significance based upon an alpha cutoff value, and searched for overlap between the lists of  
51 significant eQTLs. These studies provide lists of eQTLs present or absent in each context, but do not  
52 explicitly model changes between eQTLs across contexts and can be misleading due to variation in  
53 statistical power between contexts. Therefore, many recent studies have jointly modeled different  
54 contexts to ameliorate the differences in statistical power, and identify eQTLs unique and shared  
55 between treatments. Here, we used an interaction term in a mixed model to describe how eQTLs  
56 change between baseline (MCK) and treatment of PBMCs (LPS, RCA, HDE) in European Warmblood  
57 horses. Additionally, we updated previously published eQTLs to the EquCab3.0 reference genome,  
58 and identified pathways significantly enriched for genes with altered gene expression regulation  
59 between MCK and each PBMC treatment (LPS, RCA, or HDE) with *Ingenuity Pathway Analysis* (IPA)  
60 [13].

## 61 2. Materials and Methods

62 An outline of the computational workflow is shown in figure 1.

### 63 2.1. Sample Information

64 Samples used in this study were previously collected, isolated, treated, and extracted as  
65 described in earlier publications [2,6–8,14,15]. Horses were kept in "low dust" environments before  
66 sample collection so that the SEA affected horses were in partial or full remission of SEA [2]. Horses  
67 were kept in stables with daily access to pasture all over Switzerland [2]. SEA horses received no  
68 prior treatment for SEA and a clinical exam was performed to rule out other systemic or localized  
69 infections [2].

70 DNA was previously extracted from PBMCs during two different studies [6,7]. PBMCs were  
71 previously treated, RNA extracted, and RNA sequenced (RNAseq) by Pacholewska et al. [15].  
72 Pacholewska et al. followed the density gradient centrifugation procedure from Hamza et al. to  
73 isolate PBMCs and followed the treatment of PBMCs and RNA extraction method from Lanz et al.  
74 [2,14,15]. European Warmblood horses were selected as the breed to study because of the two  
75 warmblood families (Fam1 and Fam2) with high incidences of SEA [16]. eQTL analyses used DNA  
76 and RNA from 82 European Warmblood horses (40 with SEA, and 42 healthy). Ages of SEA (mean =  
77 16.7, min = 10, max = 24, units = years) and healthy controls (mean = 17.8, min = 6, max = 32, units =  
78 years) were comparable. These 82 horses belong to three familial cohorts, two half-sibling (half-sib)  
79 families with 17 individuals (Fam1) and 15 individuals (Fam2) respectively, and 50 unrelated horses.  
80 The sires of Fam1 and Fam2 both had SEA. Unrelated horses are not part of Fam1 or Fam2, and do  
81 not show strong patterns of population structure within the group (S3 Fig). Unrelated horses are  
82 minimally two generations removed from one another (unrelated at the grandparent level) [7].

### 83 2.2. SNP coordinate conversion to EquCab3.0 and filtration

84 We used the NCBI remap API to convert a VCF file of imputed SNPs from EquCab2 to a VCF  
85 file with coordinates for EquCab3. The VCF file used is available on the European Variant Archive  
86 (EVA) as project accession: PRJEB23301. This file was split into separate files with 5,000 lines each  
87 with a python script. Then each file was submitted to the NCBI remap API with `remap_api.pl` to  
88 convert the SNP coordinates. We used the parameters `--mode asm-asm` and converted `--from`  
89 `GCF_000002305.2` to `--dest GCF_002863925.1`, and specified `-in_format vcf` and `-out_format vcf`.  
90 Meta-data in the output VCF file was not properly preserved, and therefore we replaced the  
91 genotypes in the output file with the correct values from the input files with a python script.

92 SNPs with a minor allele frequency less than 0.05 were removed. We removed SNPs that  
93 deviated strongly from HWE  $p$ -value  $< 1e-6$  when only including healthy individuals. SNPs were

94 filtered with vcfTools v0.1.14 [17]. PCA plots based upon SNP genotypes was previously published  
95 [8].

### 96 2.3. RNA sequences remapped to EquCab3.0 and gene expression counts

97 RNA sequences were remapped to the EquCab3 genome with STAR v.2.5.3a [18]. We set the  
98 parameters for STAR as follows: `--outFilterMultimapNmax 50 --seedSearchStartLmax 25 --`  
99 `alignIntronMin 20 --alignIntronMax 1000000 --alignMatesGapMax 100000 --sjdbGTFfeatureExon`  
100 `exon --sjdbGTFtagExonParentTranscript Parent --sjdbGTFtagExonParentGene gene --`  
101 `outFilterMismatchNmax 4 --outFilterType BySJout SortedByCoordinate --outSAMstrandField`  
102 `intronMotif`.

103 The counting of and normalization of RNA molecules was done following Mason et al. (2018)  
104 with minor changes [8]. We defined gene features with the NCBI annotation (release 103) of the horse  
105 reference genome sequence EquCab3.0 (Assembly accession: GCF\_002863925.1). We specified  
106 desired features to be all transcripts of genes with the `transcriptsBy()` function in the Bioconductor R  
107 library *GenomicFeatures* [19]. We counted the number of RNA reads that aligned to all transcripts of  
108 each gene with the `summarizeOverlaps()` function in the Bioconductor R *GenomicAlignments* library  
109 [19]. We simplified the count matrix to have one feature per gene, making genes (not transcripts of  
110 genes) the RNAseq count feature. In the `summarizeOverlaps` function we specified 'mode = "Union",  
111 `singleEnd = FALSE, ignore.strand = TRUE, fragments = TRUE`'. We counted each treatment  
112 separately, and required genes to have at least one RNAseq read aligned to the gene in one  
113 individual. We normalized read counts to make them comparable across individuals in *DESeq2*, and  
114 then exported them to calculate a mean read count cutoff with the KS test statistic [8]. Genes with  
115 mean normalized read counts below this mean count threshold removed from analysis for each  
116 treatment separately. After trimming the number of genes, the gene expression raw counts were  
117 again normalized and then variance stabilized with the `varianceStabilizingTransformation()` in  
118 *DESeq2* once for each treatment separately [20]. PCA plots of the variance stabilized gene counts were  
119 generated with *DESeq2* (Fig S01). No individuals were identified to have aberrant expression profiles  
120 after analyzing the PCA plots, therefore no individuals were removed based upon expression profiles  
121 (Fig S01).

### 122 2.4 eQTL analyses

123 We performed four multivariate linear models with *Matrix eQTL* (one for each context) to  
124 determine presence or absence of eQTLs in each treatment, and one mixed linear model to detect  
125 significant interaction terms representing significant changes in gene expression regulation between  
126 MCK and each treatment respectively.

#### 127 2.4.1 Multivariate linear models with *Matrix eQTL*

128 eQTLs for each treatment were detected with *Matrix eQTL* [21]. Local eQTL relationships within  
129 500,000 bp upstream and 500,000 bp downstream of each gene's transcription start site were tested  
130 for 833,937 SNPs and 13,849 genes. eQTLs with FDR values less than 0.05 were considered significant.  
131 Significant eQTLs from these analyses were used to determine presence or absence of eQTLs for each  
132 treatment. The following multivariate model was used for the analyses.

$$133 \mathbf{y} \sim \mathbf{X}\boldsymbol{\beta} + \mathbf{m}u + \boldsymbol{\varepsilon} \quad (1)$$

134 In equation two,  $\mathbf{y}$  represents the dependent variable (normalized and variance stabilized  
135 gene expression),  $\mathbf{X}$  is an incidence matrix for fixed effects intercept, age, sex, Fam1, Fam2, and  
136 disease status,  $\boldsymbol{\beta}$  is the solution for the fixed effects intercept, age (in years), sex, Fam1, and Fam2,  
137  $\mathbf{m}$  is a vector of SNP marker genotypes,  $u$  is the SNP marker effect, and  $\boldsymbol{\varepsilon}$  are the residuals.

#### 140 2.4.2 Mixed linear model analysis in R

141 The mixed model was ran on all local eQTL relationships within 500,000 bp upstream and  
142 500,000 bp downstream of each gene's transcription start site were tested for 833,937 SNPs and 13,849  
143 genes. We wrote a program in R that implemented a mixed model to jointly model one untreated  
144 baseline group, and three treatments of peripheral blood mononuclear cells (PBMCs) in European  
145 Warmblood horses to describe significant changes in eQTLs between baseline and the three  
146 treatments of PBMCs. The mixed model included an interaction term between genotype and context  
147 (treatment), corrected for effects due to population structure with binary variables Fam1 and Fam2,  
148 and we included a random intercept for each individual in R v.3.4.2 with R library hglm v.2.1-1  
149 [22,23].

150

$$151 \mathbf{y} \sim \mathbf{X}\boldsymbol{\beta} + (\mathbf{m}\mathbf{Y})\mathbf{u} + \mathbf{Z}\mathbf{u} + \boldsymbol{\varepsilon} \quad (2)$$

152

153 In equation two,  $\mathbf{y}$  is the dependent variable representing the residuals of the trimmed, normalized,  
154 and variance stabilized gene expression counts. In equation one,  $\mathbf{X}$  is an incidence matrix for fixed  
155 effects intercept, age, sex, Fam1, Fam2, disease status, SNP genotype (0, 1, or 2 for each individual: 0  
156 is homozygous reference allele, 1 is heterozygous, and 2 is homozygous alternative allele), LPS  
157 context, RCA context, and HDE context,  $\boldsymbol{\beta}$  is the solution for the fixed effects intercept, age (in  
158 years), sex, Fam1, Fam2, disease status, SNP genotype, LPS context, RCA context, and HDE context,  
159  $\mathbf{m}$  is a vector of SNP marker genotypes,  $\mathbf{Y}$  is an incidence matrix that identified which gene  
160 expression values were present in which context (LPS, RCA, and HDE),  $\mathbf{u}$  is the interaction effect  
161 of  $\mathbf{m} * \mathbf{Y}$ ,  $\mathbf{Z}$  is an incidence matrix which identified the repeated gene expression measurements  
162 (one from each context) for each individual,  $\mathbf{u}$  is the vector of random individual effects, and  $\boldsymbol{\varepsilon}$  is  
163 the random residuals.

#### 164 2.5. Removing associations with outlier individuals for the mixed model

165 Prior to multiple testing correction, we removed all models where with outlier individuals.  
166 Outlier individuals were identified by the R module hglm as "influential observations". Influential  
167 observations were identified with the value "\$bad" in the R model object of class hglm.

#### 168 2.5. Multiple testing correction for the mixed model

169 All raw p-values were corrected for multiple testing with EigenMT [24]. We ran EigenMT for  
170 each chromosome and for each covariate of interest. EigenMT also selects the best eSNP for each gene.  
171 We set the window size to include 200 SNPs, the variance threshold to 0.99, the *cis* distance to 500,000  
172 (equivalent to 1Mb window), and considered results as significant if the adjusted p-value was < 0.05.

#### 173 2.6. Pathway analysis

174 A core analysis in Ingenuity Pathway Analysis (IPA) v.01-13 was run on all genes from eQTLs  
175 with significant interaction terms between baseline (MCK) and each of the three treatments of PBMCs  
176 (LPS, RCA, and HDE) [13]. Results were considered significant if the p-value was less than 1e-2.  
177 Results discussed are from the canonical pathway analysis. Gene names were mapped onto human,  
178 mouse and rat. We required the relationship between molecules to be direct and experimentally  
179 observed.

#### 180 2.7. Data availability

181 RNAseq data is deposited in the European Nucleotide Archive (ENA), and can be accessed at:  
182 <http://www.ebi.ac.uk/ena/data/view/PRJEB7497> (project ID: PRJEB7497). Imputed SNP genotypes  
183 are submitted to European Variant Archive (EVA), project accession: PRJEB23301. Relevant python,  
184 R, and bash code is available on GitHub: <https://github.com/VCMason>.

### 185 3. Results

186 3.1. *EquCab2.0 vs EquCab3.0*

187 Gene expression counts in MCK were similar between *EquCab2* and *EquCab3* ( $r^2 = 0.96$ ) (Fig  
188 S02).

189 3.1. *Changes in gene expression regulation by genotype due to PBMC treatment*

190 An eQTL represents a significant association between a SNP's genotype and a gene's expression,  
191 while a significant interaction term represents a significant change in slope of an eQTL between MCK  
192 and each individual context. We detected 72,364 MCK, 100,382 LPS, 72,030 RCA, and 90,998 HDE  
193 significant eQTLs through *Matrix eQTL* analyses (Tables S1-S4). We detected a significantly different  
194 genotypic effect on gene expression between MCK and LPS, RCA, or HDE (a significant  
195 SNP×Treatment interaction term) for 1,057, 938, and 1,847 genes respectively (Tables S5-S7). To be  
196 kept for further analyses, we required each gene SNP pair with a significant interaction term (Tables  
197 S5-S7) to also be a significant eQTL in 1) MCK, 2) a treatment (LPS, RCA, or HDE), or 3) both MCK  
198 and treatment (Table 1, & S1-S4). This reduced the list of eQTLs analyzed to 144 for LPS, 60 for RCA,  
199 and 213 for HDE (Fig 2). Biologically, these represent 1) eQTLs present in MCK but not present in a  
200 treatment, 2) eQTLs present in a treatment but not present in MCK, 3) eQTLs present in both MCK  
201 and a treatment with the same direction of effect, or 4) eQTLs present in both MCK and a treatment  
202 with opposing directions of effect (Fig 2) [12]. We report the number of eQTLs with significant  
203 interaction terms present in each of the four scenarios (Table 1).

204 We found no eQTLs with opposing directions of effect when eQTLs were significant in both  
205 MCK and a treatment (black data-points) (Fig 2, Table 1). All data points with opposing directions of  
206 effect in figure 1 have one non-significant gene/SNP association in either MCK or a treatment (orange  
207 or blue data-points). Therefore, we found no evidence that SNPs associated with significant changes  
208 in gene expression between MCK and a treatment caused strong opposing regulatory effects. Rather,  
209 the majority of eQTLs with a significant difference in gene expression regulation between contexts  
210 resulted in either a complete loss of an eQTL, gain of an eQTL, or the eQTL was modified but  
211 maintained the same direction of effect.

212

|                       | MCK Only | Treatment Only | MCK &<br>Treatment | Not MCK or<br>Treatment | Total |
|-----------------------|----------|----------------|--------------------|-------------------------|-------|
| MCK×LPS: Same DOE     | 39       | 45             | 24                 | 102                     | 210   |
| MCK×LPS: Opposite DOE | 19       | 17             | 0                  | 811                     | 847   |
| MCK×LPS: Total        | 58       | 62             | 24                 | 913                     | 1057  |
| MCK×RCA: Same DOE     | 24       | 10             | 11                 | 79                      | 124   |
| MCK×RCA: Opposite DOE | 13       | 2              | 0                  | 799                     | 814   |
| MCK×RCA: Total        | 37       | 12             | 11                 | 878                     | 938   |
| MCK×HDE: Same DOE     | 62       | 38             | 71                 | 234                     | 405   |
| MCK×HDE: Opposite DOE | 39       | 3              | 0                  | 1400                    | 1442  |
| MCK×HDE: Total        | 101      | 41             | 71                 | 1634                    | 1847  |

213 **Table 1.** The numbers of eQTLs with similar or opposite directions of effect (DOE) when MCK is  
214 compared to a treatment (LPS, RCA, or HDE).

215 3.2. *IPA*

216 Three separate core analyses in IPA (one for each treatment) discovered biological pathways  
217 significantly ( $p$ -value < 0.01) enriched for genes with significantly (adjusted  $p$ -value < 0.05) altered  
218 gene expression regulation due PBMC treatment (Tables 2). Each treatment (LPS, RCA, and HDE)  
219 resulted in unique canonical pathways enriched for genes with altered gene expression regulation  
220 (relative to MCK) (Table 2).

221

### Interaction

| Term    | Ingenuity Canonical Pathways                   | $-\log(pval)$ | Ratio  | Molecules                           |
|---------|------------------------------------------------|---------------|--------|-------------------------------------|
| SNPxLPS | RhoA Signaling                                 | 2.53          | 0.0323 | PLXNA1,KTN1,ROCK1,RDX               |
| SNPxRCA | Citrulline-Nitric Oxide Cycle                  | 2.04          | 0.2    | ASS1                                |
| SNPxRCA | L-carnitine Biosynthesis                       | 2.26          | 0.333  | ALDH9A1                             |
| SNPxHDE | UVA-Induced MAPK Signaling                     | 2.79          | 0.0446 | PIK3R2,RAP1B,BCL2L1,RPS6KB1,RPS6KC1 |
| SNPxHDE | Role of Tissue Factor in Cancer                | 2.5           | 0.0385 | PIK3R2,F7,RAP1B,BCL2L1,RPS6KB1      |
| SNPxHDE | Fc $\gamma$ RIIB Signaling in B Lymphocytes    | 2.4           | 0.0471 | PIK3R2,CACNB4,RAP1B,CACNA1D         |
| SNPxHDE | Cholesterol Biosynthesis III (via Desmosterol) | 2.38          | 0.154  | SC5D,DHCR7                          |
|         | Cholesterol Biosynthesis II (via 24,25-        |               |        |                                     |
| SNPxHDE | dihydrolanosterol)                             | 2.38          | 0.154  | SC5D,DHCR7                          |
| SNPxHDE | Cholesterol Biosynthesis I                     | 2.38          | 0.154  | SC5D,DHCR7                          |
| SNPxHDE | Acute Myeloid Leukemia Signaling               | 2.16          | 0.0404 | PIK3R2,RAP1B,IDH1,RPS6KB1           |
|         | Melanocyte Development and Pigmentation        |               |        |                                     |
| SNPxHDE | Signaling                                      | 2.09          | 0.0385 | PIK3R2,RAP1B,RPS6KB1,RPS6KC1        |
| SNPxHDE | Histamine Degradation                          | 2.05          | 0.105  | ALDH1L2,ALDH1A3                     |

222 **Table 2.** Significant canonical pathways with a significant number of genes with altered gene  
 223 expression regulation.  
 224

### 225 4. Limitations

226 Horses with and without SEA were included in this study. We accounted for variation associated  
 227 with disease status in the linear model, however some variation due to disease status (and other  
 228 covariates) that is not explained by the fitted linear relationships may still be unaccounted for. Our  
 229 method to determine presence or absence of eQTLs in each context might be improved with joint  
 230 modeling of all treatments. We detected canonical pathways significantly enriched for genes with  
 231 altered gene expression in PBMCs due to treatment. In the discussion we hypothesize about their  
 232 relevance in horses, however we do not have further evidence about gene expression patterns in other  
 233 tissues. Therefore, our hypotheses should be interpreted in an accordingly limited fashion.

### 234 5. Discussion

235 We discovered eQTLs associated with significant changes in gene expression regulation due to  
 236 treatment of PBMCs in European Warmblood horses to identify gene pathways affected by treatment  
 237 of LPS, RCA, or HDE. We removed variation in eQTLs correlated with age, sex, family structure, and  
 238 disease (SEA) status to discover changes in eQTLs due to antigen treatment. By adjusting for these  
 239 confounding factors, we focused our analysis on changes in gene expression regulation caused by  
 240 antigen treatments. We expected LPS to influence genes involved in inflammatory regulation because  
 241 it is present in the cell membrane of gram-negative bacteria, RCA to elicit an immune response as it  
 242 is an antigen released from parasitic cyathostomins, and HDE to elicit allergic and inflammatory  
 243 responses as HDE is derived from moldy hay. Therefore, we hypothesized that gene expression  
 244 regulation altered by PBMC treatment would affect pathways involved in inflammatory and allergic  
 245 immune responses. We detected significant canonical pathways for each treatment. However, the  
 246 results for RCA may not be robust as only one gene was present in significant pathways. Therefore,  
 247 we focused the discussion of significant canonical pathways on LPS and HDE treatments.

248 LPS altered gene expression for a significant number of genes in the RhoA signaling pathway.  
 249 The RhoA signaling pathway is critical to pro-inflammatory responses and LPS/NF- $\kappa$ B signaling [25].  
 250 Depletion of RhoA in a human lung cancer cell line has been shown to significantly reduce the LPS-

251 induced secretion of IL-6 and IL-8 [25]. Therefore, we hypothesize that RhoA also plays a role in the  
252 inflammatory response following PBMC stimulation with LPS in horses.

253 HDE significantly altered gene expression regulation in pathways involving cellular signaling,  
254 blood coagulation, vascular inflammation, and B cell signaling (Table 2). HDE influenced the  
255 histamine degradation pathway. Dietary histamines can cause allergic symptoms, gastrointestinal  
256 ailments, inflammatory responses, as well as a variety of other symptoms in histamine intolerant  
257 patients [26]. Histamine is present in respirable hay dust, and has been implicated as an irritating  
258 agent that contributes to respiratory problems, and is an inflammatory mediator secreted by IgE  
259 activated mast cells [27,28]. Cholesterol biosynthesis was also influenced by HDE treatment. Dietary  
260 cholesterol increases production of inflammatory indicators (IL-4 and IFN- $\gamma$ ) in lung lymphocytes in  
261 mice [29]. The two genes (*SC5D* and *DHCR7*) with altered gene expression regulation are required  
262 for the final steps of cholesterol biosynthesis (Table 2) [30,31]. Therefore, altered cholesterol  
263 metabolism could also contribute to the inflammatory symptoms in horses after inhalation of hay  
264 dust. Fc $\gamma$ RIIB signaling in B lymphocytes was significantly affected by treatment of PBMCs with  
265 HDE. Fc $\gamma$  receptors activate or inhibit inflammatory responses, and a proper balance is critical for  
266 normal immune response [32,33]. Fc $\gamma$ RIIB is the only inhibitory Fc $\gamma$  receptor, making it critical for  
267 controlled immune responses, and acts as a negative regulator of B cell activation.

## 268 6. Conclusions

269 We found no evidence that SNPs associated with significant changes in gene expression between  
270 MCK and a treatment in PBMCs caused strong opposing regulatory effects. Pathways influenced by  
271 PBMC treatment through changes in gene expression regulation include: RhoA signaling in LPS, as  
272 well as histamine degradation, cholesterol biosynthesis, Fc $\gamma$ RIIB signaling, and others in HDE. Our  
273 results support previous research indicating that pathways altered between baseline and treatment  
274 of PBMCs in horses with LPS or HDE affect inflammatory responses through RhoA, B-cell signaling,  
275 IL-4 and IFN- $\gamma$ , and histamine.

276 **Author Contributions:** Conceptualization, VCM.; Methodology, VCM.; Software, VCM.; Validation, VCM.;  
277 Formal Analysis, VCM.; Investigation, VCM.; Resources, VG. and TL.; Data Curation, VCM.; Writing-Original  
278 Draft Preparation, VCM.; Writing-Review & Editing, VCM., VG., and TL.; Visualization, VCM.; Supervision,  
279 VCM., VG., And TL.; Project Administration, VCM., VG., and TL.; Funding Acquisition, VG.

280 **Funding:** This project was funded by the Swiss National Science Foundation (grant number 31003A-162548/1)  
281 and the ISME (Swiss Institute of Equine Medicine) Research Group.

282 **Acknowledgments:** Thank you to Matthias Kraft and Dr. Vidhya Jagannathan for many stimulating  
283 conversations and helpful suggestions.

284 **Conflicts of Interest:** The authors declare no conflict of interest.

## 285 Appendix A

286 **Figure 1.** Flow chart depicting informatic methods. **Figure 2.** Differences in eQTLs between  
287 baseline (MCK) and the three treatments of PBMCs B) LPS, C) RCA, and D) HDE. A) A partial  
288 regression plot for the interaction term SNP $\times$ LPS shows the difference in slope of an eQTL for gene  
289 RDX and the SNP located on chromosome 7 position 19442134 between MCK and LPS. The partial  
290 regression plot scales the eQTL in MCK to have a slope of zero and is represented by the dashed line.  
291 The eQTL in LPS is represented by the solid black line and the standard error of the eQTL is  
292 represented by the grey shading. Circles represent homozygous reference, triangles are  
293 heterozygous, and plus symbols represent homozygous alternative genotypes. The y-axis is the  
294 residuals of gene expression that is not explained by any covariates (excluding SNP $\times$ LPS). The x-axis  
295 is the residuals of product of SNP  $\times$  LPS that is not explained by any other covariates. SNP  
296 is represented by values 0, 1, and 2 while LPS is 0 or 1. The three remaining figure sections represent  
297 the significance and change of gene expression regulation between baseline (MCK) and the three  
298 treatments of PBMCs B) LPS, C) RCA, and D) HDE. The area of the plot points are proportional to  
299 the  $-\log_{10}$  of the p-values of the SNP $\times$ Treatment interaction term. The slopes of the eQTLs in MCK

300 are plotted on the x-axis in B), C), and D). The slopes of the same eQTLs after treatment are plotted  
301 on the y-axis for B) LPS, C) RCA, and D) HDE. eQTLs significant in MCK, but not in a treatment B)  
302 LPS, C) RCA, or D) HDE are colored orange. eQTLs not significant in MCK but significant in a  
303 treatment B) LPS, C) RCA, or D) HDE are colored blue. eQTLs significant in both contexts B) MCK  
304 and LPS, C) MCK and RCA, and D) MCK and HDE are colored black. **Table S1.** Significant eQTLs  
305 (FDR < 0.05) in MCK calculated for the EquCab3 genome with *Matrix eQTL*. **Table S2.** Significant  
306 eQTLs (FDR < 0.05) in LPS calculated for the EquCab3 genome with *Matrix eQTL*. **Table S3.**  
307 Significant eQTLs (FDR < 0.05) in RCA calculated for the EquCab3 genome with *Matrix eQTL*. **Table**  
308 **S4.** Significant eQTLs (FDR < 0.05) in HDE calculated for the EquCab3 genome with *Matrix eQTL*.  
309 **Table S5.** EigenMT results reporting significant (Bonferroni correction < 0.05) SNP×LPS interaction  
310 terms. Table header labels are described as follows: 'SNP' is the chromosome.position of the SNP in the  
311 genome, 'gene' is the gene name, 'beta' is the slope of the interaction term, 't-stat' is the t-statistic  
312 value, 'p-value' is the unadjusted p-value, 'BF' is the Bonferroni corrected p-values of the interaction  
313 term, 'TESTS' equals the effective number of SNPs used for the Bonferroni correction. **Table S6.**  
314 EigenMT results reporting significant (Bonferroni correction < 0.05) SNP×RCA interaction terms.  
315 Table header labels are described as follows: 'SNP' is the chromosome.position of the SNP in the  
316 genome, 'gene' is the gene name, 'beta' is the slope of the interaction term, 't-stat' is the t-statistic value,  
317 'p-value' is the unadjusted p-value, 'BF' is the Bonferroni corrected p-values of the interaction term,  
318 'TESTS' equals the effective number of SNPs used for the Bonferroni correction. **Table S7.** EigenMT  
319 results reporting significant (Bonferroni correction < 0.05) SNP×HDE interaction terms. Table header  
320 labels are described as follows: 'SNP' is the chromosome.position of the SNP in the genome, 'gene' is  
321 the gene name, 'beta' is the slope of the interaction term, 't-stat' is the t-statistic value, 'p-value' is the  
322 unadjusted p-value, 'BF' is the Bonferroni corrected p-values of the interaction term, 'TESTS' equals  
323 the effective number of SNPs used for the Bonferroni correction.

## 324 References

- 325 1. Sen, P.; Kempainen, E.; Orešič, M. Perspectives on Systems Modeling of Human Peripheral Blood  
326 Mononuclear Cells. *Front. Mol. Biosci.* **2018**, *4*, 1–11, doi:10.3389/fmolb.2017.00096.
- 327 2. Lanz, S.; Gerber, V.; Marti, E.; Rettmer, H.; Klukowska-Rötzler, J.; Gottstein, B.; Matthews, J. B.; Pirie, S.;  
328 Hamza, E. Effect of hay dust extract and cyathostomin antigen stimulation on cytokine expression by  
329 PBMC in horses with recurrent airway obstruction. *Vet. Immunol. Immunopathol.* **2013**, *155*, 229–237,  
330 doi:10.1016/j.vetimm.2013.07.005.
- 331 3. Pacholewska, A.; Drögemüller, M.; Klukowska-Rötzler, J.; Lanz, S.; Hamza, E.; Dermitzakis, E. T.; Marti,  
332 E.; Gerber, V.; Leeb, T.; Jagannathan, V. The transcriptome of equine peripheral blood mononuclear cells.  
333 *PLoS One* **2015**, *10*, 1–16, doi:10.1371/journal.pone.0122011.
- 334 4. Pacholewska, A.; Jagannathan, V.; Drögemüller, M.; Klukowska-Rötzler, J.; Lanz, S.; Hamza, E.;  
335 Dermitzakis, E. T.; Marti, E.; Leeb, T.; Gerber, V. Impaired cell cycle regulation in a natural equine model  
336 of asthma. *PLoS One* **2015**, *10*, 1–23, doi:10.1371/journal.pone.0136103.
- 337 5. Pacholewska, A.; Marti, E.; Leeb, T.; Jagannathan, V.; Gerber, V. LPS-induced modules of co-expressed  
338 genes in equine peripheral blood mononuclear cells. *BMC Genomics* **2017**, *18*, 34, doi:10.1186/s12864-016-  
339 3390-y.
- 340 6. Swinburne, J. E.; Bogle, H.; Klukowska-Rötzler, J.; Drögemüller, M.; Leeb, T.; Temperton, E.; Dolf, G.;  
341 Gerber, V. A whole-genome scan for recurrent airway obstruction in Warmblood sport horses indicates  
342 two positional candidate regions. *Mamm. Genome* **2009**, *20*, 504–515, doi:10.1007/s00335-009-9214-5.
- 343 7. Shakhshi-Niaei, M.; Klukowska-Rötzler, J.; Drögemüller, C.; Swinburne, J.; Ehrmann, C.; Saftic, D.;  
344 Ramseyer, A.; Gerber, V.; Dolf, G.; Leeb, T. Replication and fine-mapping of a QTL for recurrent airway  
345 obstruction in European Warmblood horses. *Anim. Genet.* **2012**, *43*, 627–631, doi:10.1111/j.1365-  
346 2052.2011.02315.x.



- 347 8. Mason, V. C.; Schaefer, R. J.; Mccue, M. E.; Leeb, T.; Gerber, V. eQTL discovery and their association  
348 with severe equine asthma in European Warmblood horses. **2018**, 1–15.
- 349 9. Peirce, J. L.; Li, H.; Wang, J.; Manly, K. F.; Hitzemann, R. J.; Belknap, J. K.; Rosen, G. D.; Goodwin, S.;  
350 Sutter, T. R.; Williams, R. W.; Lu, L. How replicable are mRNA expression QTL? *Mamm. Genome* **2006**,  
351 *17*, 643–656, doi:10.1007/s00335-005-0187-8.
- 352 10. Holloway, B.; Luck, S.; Beatty, M.; Rafalski, J.-A.; Li, B. Genome-wide expression quantitative trait loci  
353 (eQTL) analysis in maize. *BMC Genomics* **2011**, *12*, 336, doi:10.1186/1471-2164-12-336.
- 354 11. Fairfax, B. P.; Humburg, P.; Makino, S.; Naranbhai, V.; Wong, D.; Lau, E.; Jostins, L.; Plant, K.; Andrews,  
355 R.; McGee, C.; Knight, J. C. Innate Immune Activity Conditions the Effect of Regulatory Variants upon  
356 Monocyte Gene Expression. *Science (80-. )*. **2014**, *343*, 1246949–1246949, doi:10.1126/science.1246949.
- 357 12. Peters, J. E.; Lyons, P. A.; Lee, J. C.; Richard, A. C.; Fortune, M. D.; Newcombe, P. J.; Richardson, S.;  
358 Smith, K. G. C. Insight into Genotype-Phenotype Associations through eQTL Mapping in Multiple Cell  
359 Types in Health and Immune-Mediated Disease. *PLoS Genet.* **2016**, *12*, doi:10.1371/journal.pgen.1005908.
- 360 13. Krämer, A.; Green, J.; Pollard, J.; Tugendreich, S. Causal analysis approaches in ingenuity pathway  
361 analysis. *Bioinformatics* **2014**, *30*, 523–530, doi:10.1093/bioinformatics/btt703.
- 362 14. Hamza, E.; Doherr, M. G.; Bertoni, G.; Jungi, T. W.; Marti, E. Modulation of allergy incidence in icelandic  
363 horses is associated with a change in IL-4-producing T cells. *Int. Arch. Allergy Immunol.* **2007**, *144*, 325–  
364 337, doi:10.1159/000106459.
- 365 15. Pacholewska, A.; Drögemüller, M.; Klukowska-Rötzler, J.; Lanz, S.; Hamza, E.; Dermitzakis, E. T.; Marti,  
366 E.; Gerber, V.; Leeb, T.; Jagannathan, V. The transcriptome of equine peripheral blood mononuclear cells.  
367 *PLoS One* **2015**, *10*, 1–16, doi:10.1371/journal.pone.0122011.
- 368 16. Gerber, V.; Baleri, J.; Klukowska-Rötzler, J.; Swinburne, J. E.; Dolf, G. Mixed Inheritance of Equine  
369 Recurrent Airway Obstruction. **2009**, *23*, 626–630.
- 370 17. Danecek, P.; Auton, A.; Abecasis, G.; Albers, C. A.; Banks, E.; DePristo, M. A.; Handsaker, R. E.; Lunter,  
371 G.; Marth, G. T.; Sherry, S. T.; McVean, G.; Durbin, R. The variant call format and VCFtools. *Bioinformatics*  
372 **2011**, *27*, 2156–2158, doi:10.1093/bioinformatics/btr330.
- 373 18. Dobin, A.; Davis, C. A.; Schlesinger, F.; Drenkow, J.; Zaleski, C.; Jha, S.; Batut, P.; Chaisson, M.; Gingeras,  
374 T. R. STAR: Ultrafast universal RNA-seq aligner. *Bioinformatics* **2013**, *29*, 15–21,  
375 doi:10.1093/bioinformatics/bts635.
- 376 19. Lawrence, M.; Huber, W.; Pagès, H.; Aboyoun, P.; Carlson, M.; Gentleman, R.; Morgan, M. T.; Carey, V.  
377 J. Software for Computing and Annotating Genomic Ranges. *PLoS Comput. Biol.* **2013**, *9*, 1–10,  
378 doi:10.1371/journal.pcbi.1003118.
- 379 20. Love, M. I.; Huber, W.; Anders, S. Moderated estimation of fold change and dispersion for RNA-seq  
380 data with DESeq2. *Genome Biol.* **2014**, *15*, 550, doi:10.1186/s13059-014-0550-8.
- 381 21. Shabalin, A. A. Matrix eQTL: Ultra fast eQTL analysis via large matrix operations. *Bioinformatics* **2012**,  
382 *28*, 1353–1358, doi:10.1093/bioinformatics/bts163.
- 383 22. Team, R. C. R: A Language and Environment for Statistical Computing. R Foundation for Statistical  
384 Computing, Vienna, Austria. Available online: <https://www.r-project.org/>.
- 385 23. Rönnegård, L.; Shen, X.; Alam, M. hglm: A Package for Fitting Hierarchical Generalized Linear Models.  
386 *R J.* **2010**, *2*, 20–28.
- 387 24. Davis, J. R.; Fresard, L.; Knowles, D. A.; Pala, M.; Bustamante, C. D.; Battle, A.; Montgomery, S. B. An  
388 Efficient Multiple-Testing Adjustment for eQTL Studies that Accounts for Linkage Disequilibrium  
389 between Variants. *Am. J. Hum. Genet.* **2016**, *98*, 216–224, doi:10.1016/j.ajhg.2015.11.021.

- 390 25. Tao, Y. A. N.; Chen, Y.; Lan, T.; Qian, H. A. I.; Wang, Y.; Jiang, L. U. LPS-induced nuclear translocation  
391 of RhoA is dependent on NF- $\kappa$ B in the human lung cancer cell line A549. **2012**, 1283–1287,  
392 doi:10.3892/ol.2012.667.
- 393 26. Maintz, L.; Novak, N. Histamine and histamine intolerance. *Am. J. Clin. Nutr.* **2007**, *85*, 1185–1196,  
394 doi:85/5/1185 [pii].
- 395 27. Siegel, P. D.; Olenchock, S. A.; Sorenson, W. G.; Lewis, D. M.; Bledsoe, T. A.; May, J. J.; Pratt, D. S.  
396 Histamine and endotoxin contamination of hay and respirable hay dust. *Scand. J. Work. Environ. Heal.*  
397 **1991**, *17*, 276–280, doi:10.5271/sjweh.1702.
- 398 28. Bullone, M.; Lavoie, J. P. Recurrent Airway Obstruction and Summer Pasture-Associated Obstructive  
399 Pulmonary Disease. In *Equine Clinical Immunology*; 2016; pp. 127–144 ISBN 9781119086512.
- 400 29. Paper, O.; Words, K. Enhancing Effect of Dietary Cholesterol and Inhibitory Effect of Pravastatin on  
401 Allergic Pulmonary Inflammation. **2004**, *112*, 599–606.
- 402 30. Ho, A. C. C.; Fung, C. W.; Siu, T. S.; Ma, O. C. K.; Lam, C. W.; Tam, S.; Wong, V. C. N. Lathosterolosis :  
403 A Disorder of Cholesterol Biosynthesis Resembling Smith-Lemli-Opitz Syndrome. *JIMD Rep.* **2013**,  
404 doi:10.1007/8904.
- 405 31. Prabhu, A. V.; Luu, W.; Li, D.; Sharpe, L. J.; Brown, A. J. DHCR7: A vital enzyme switch between  
406 cholesterol and vitamin D production. *Prog. Lipid Res.* **2016**, *64*, 138–151, doi:10.1016/j.plipres.2016.09.003.
- 407 32. Nimmerjahn, F.; Ravetch, J. V. Fc $\gamma$  receptors as regulators of immune responses. *Nat. Rev. Immunol.* **2008**,  
408 *8*, 34–47, doi:10.1038/nri2206.
- 409 33. Smith, K. G. C.; Clatworthy, M. R. Fc $\gamma$ RIIB and autoimmunity and infection: evolutionary and  
410 therapeutic implications. *Immunol. Rev.* **2010**, *10*, 328–343.
- 411
- 412

413 **Figure 1.**

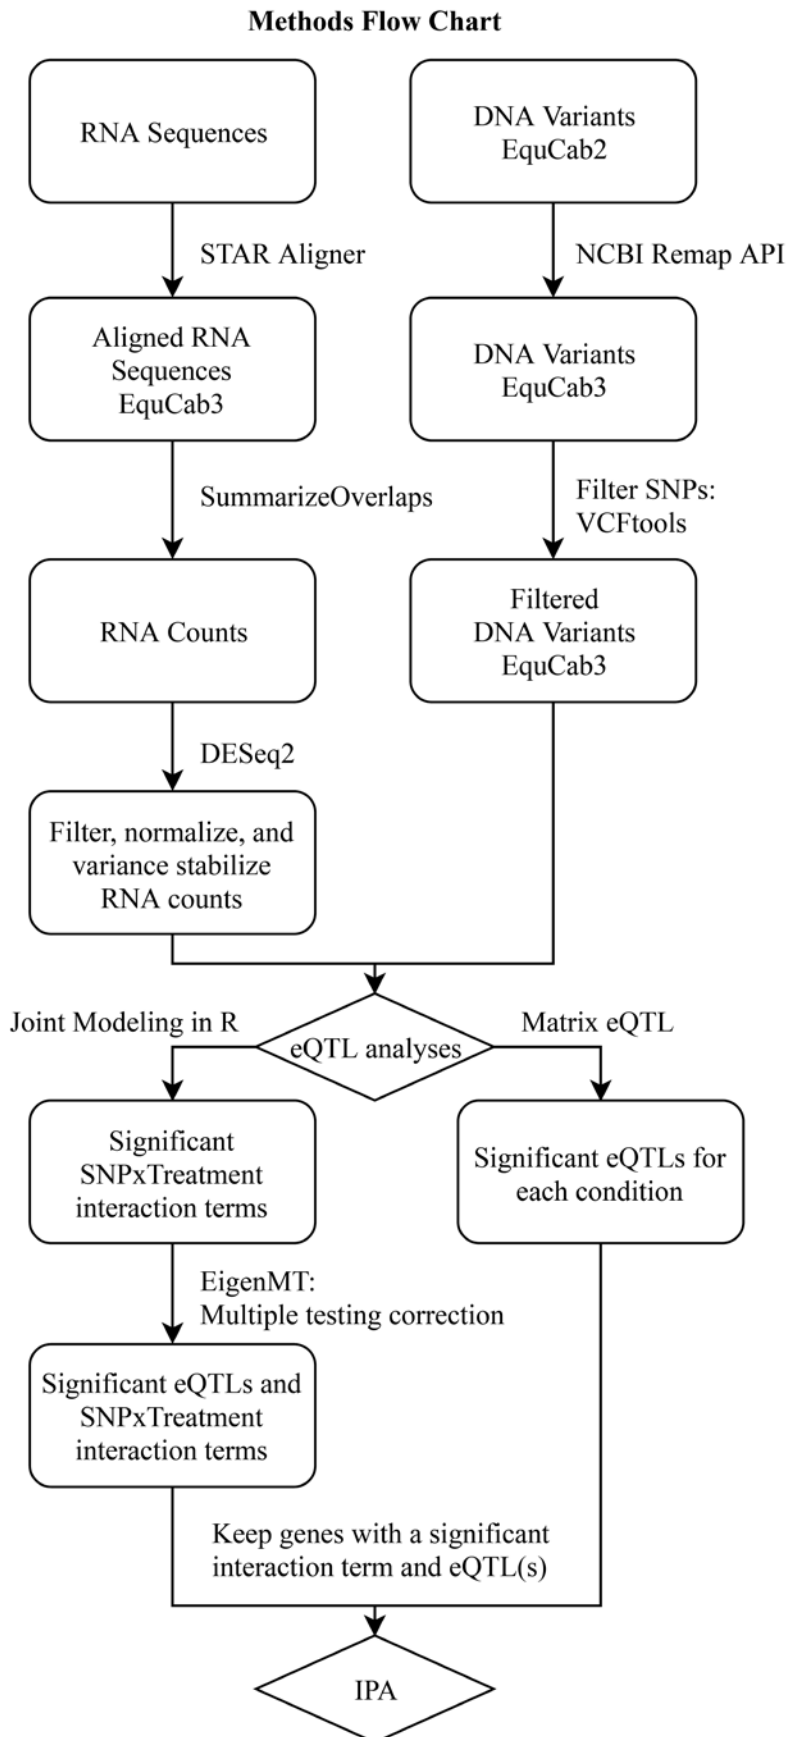

414  
415  
416

417 **Figure 2.**

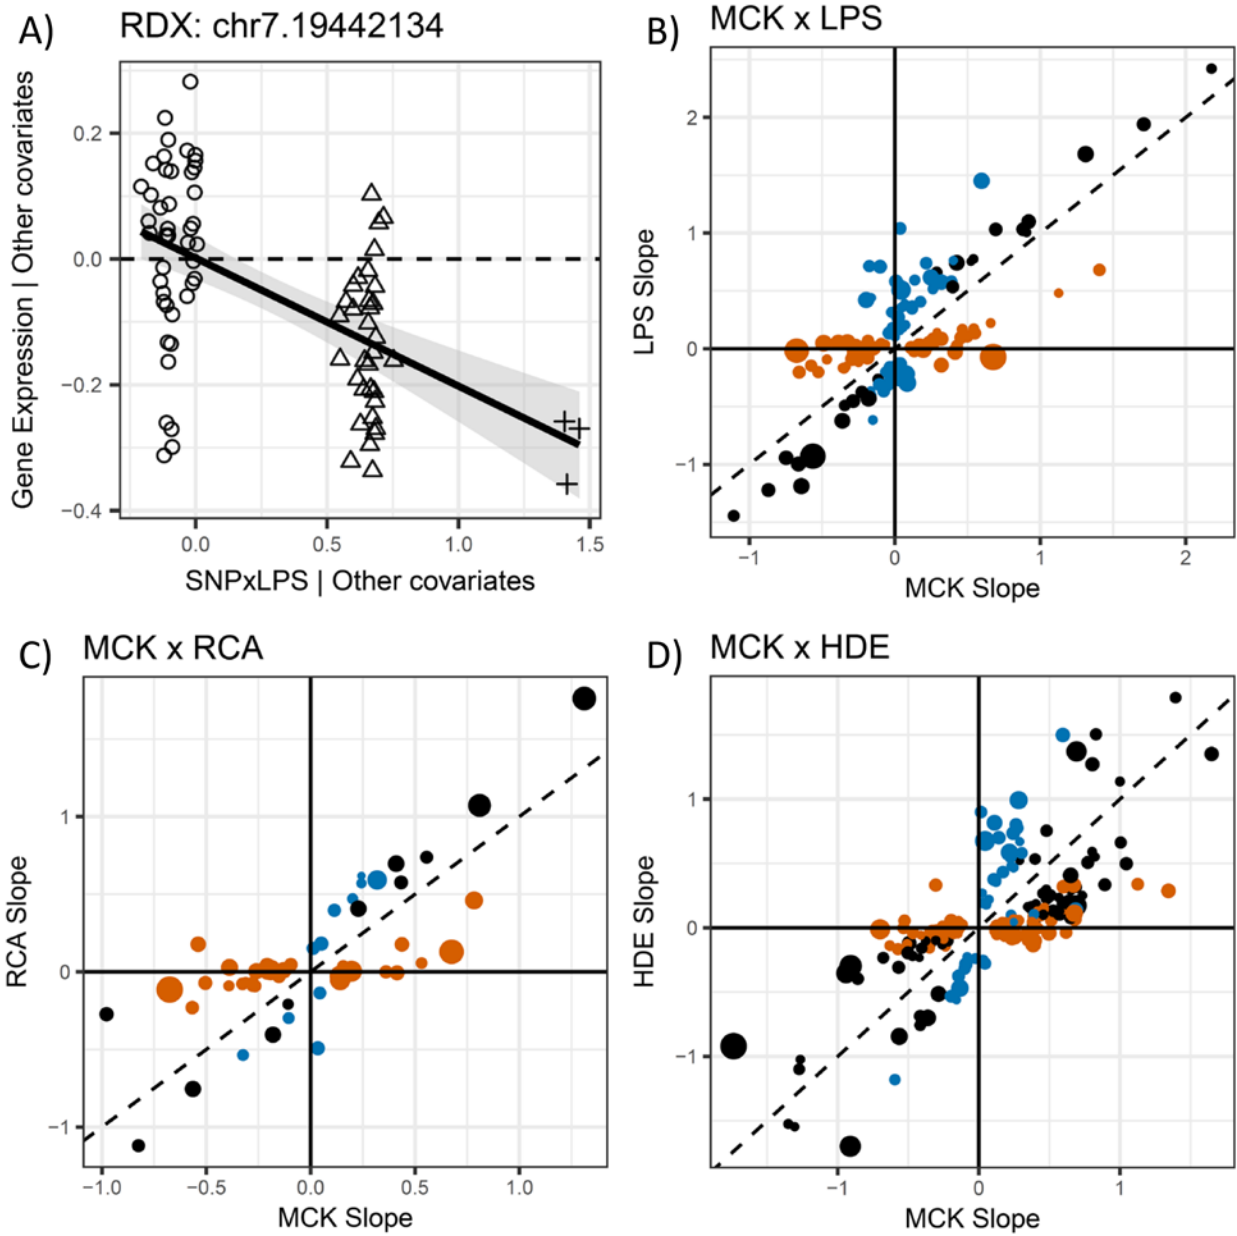

418
